# Supplementary material for: A Novel Cuticular Protein-like Cpr21L Is Essential for Nymph Survival and Male Fecundity in the Brown Planthopper
Source: MDPI journal article supplement (doi:10.3390/ijms24032163), 2023-01-21
Supplement: s1 [file s1]

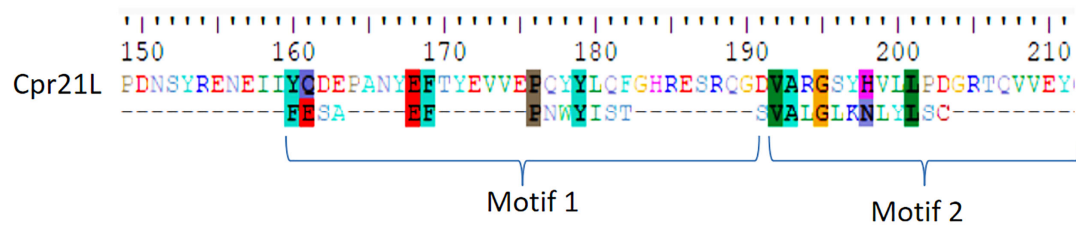

**Figure S1.** Alignment of Cpr21L with two motifs (motif-1 and motif-2). Two potential motifs, motif-1 and motif-2, are predicted by MEME based on the sequence of 15 cargoes the secretion of which was regulated by TMED10.
